# Supplementary figures and images for: Selective cancer-germline gene expression in pediatric brain tumors
Source: Springer Nature journal article supplement (doi:10.1007/s11060-008-9577-6), 2008-04-08

a.

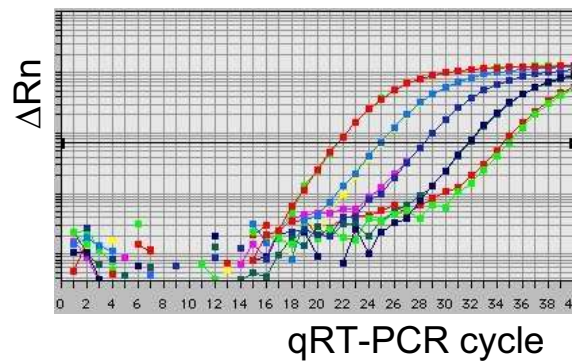

b.

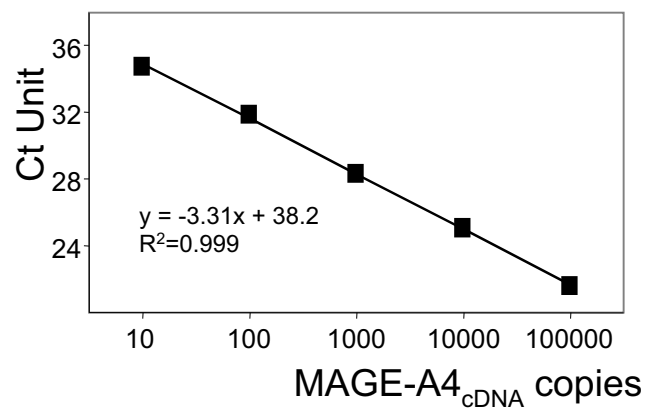

Supplement: MOESM1 [file 8946494]
